# Supplementary material
Source: PubMed Central journal article supplement (PMC5175211)
Supplement: NIHMS822996-supplement-2.pdf [file NIHMS822996-supplement-2.pdf]

## Knowledge-based Plan Quality Feedback Report

**Submitting Institution: XXXX**

**Patient Identifier: 0000**

**Report prepared on: 6/13/2016 12:00:00 AM**

### **Dosimetric Analysis Summary:**

| <b>Structure</b>   | <b>Dose criteria</b>                            | <b>KBP feedback statement</b>                                 |
|--------------------|-------------------------------------------------|---------------------------------------------------------------|
| <b>PTV 4500</b>    | <b>All metrics meet protocol specifications</b> | <b>Dose metrics are unlikely to be improved further</b>       |
| <b>Bone Marrow</b> | <b>Some acceptable deviations</b>               | <b>Some dose metrics could likely be improved</b>             |
| <b>Bowel</b>       | <b>All metrics meet protocol specifications</b> | <b>Some dose metrics could likely be improved</b>             |
| <b>Rectum</b>      | <b>Some acceptable deviations</b>               | <b>Plan could be improved to meet protocol specifications</b> |
| <b>Bladder</b>     | <b>Some acceptable deviations</b>               | <b>Some dose metrics could likely be improved</b>             |

Please review the subsequent pages of this report for individual structure DVH analysis and comparison to the knowledge-based planning reference for this patient.

The information contained in this report is designed to guide radiotherapy plan quality decision-making on the part of the submitting site. It is at the discretion of the submitting site whether or not to re-plan the case according to the patient-specific feedback in this report. Your site will need to review and determine if you will re-optimize the original plan using the KBP information provided or not re-optimize the original plan that was submitted and approved.

# Knowledge-based Plan Quality Feedback Report

Submitting Institution: XXXX

Patient Identifier: 0000

Report prepared on: 6/13/2016 12:00:00 AM

## PTV 4500 Report

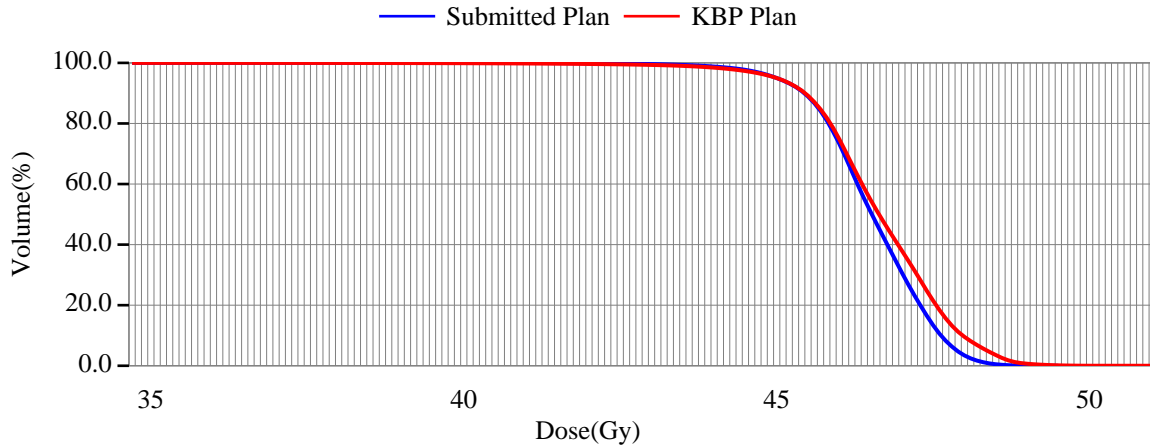

### Submitted Plan from Institution XXXX for Patient 0000

| Structure: ptv4500   |                |                              |                      |                        |                                    |                                                                               |
|----------------------|----------------|------------------------------|----------------------|------------------------|------------------------------------|-------------------------------------------------------------------------------|
| Dosimetric Parameter | Submitted Plan | protocol compliance criteria |                      |                        | Knowledge based plan quality check |                                                                               |
|                      |                | Per Protocol                 | Variation Acceptable | Deviation Unacceptable | KBP Plan                           | KBP Feedback                                                                  |
| D95%(Gy)             | 45.00          | >=45                         | >=43.65              | <43.65                 | 45.00                              | Plan meets per protocol specifications and is unlikely to be improved further |
| D97%(Gy)             | 44.67          | >=43.65                      | >=40.5               | <40.5                  | 44.60                              | Plan meets per protocol specifications and is unlikely to be improved further |
| D99%(Gy)             | 43.84          | >=40.5                       | >=39.6               | <39.6                  | 43.52                              | Plan meets per protocol specifications and is unlikely to be improved further |
| DMax(Gy)             | 49.46          | <=51.75                      | <=54                 | >54                    | 50.96                              | Plan meets per protocol specifications and is unlikely to be improved further |

## Knowledge-based Plan Quality Feedback Report

Submitting Institution: XXXX

Patient Identifier: 0000

Report prepared on: 6/13/2016 12:00:00 AM

### Bone Marrow Report

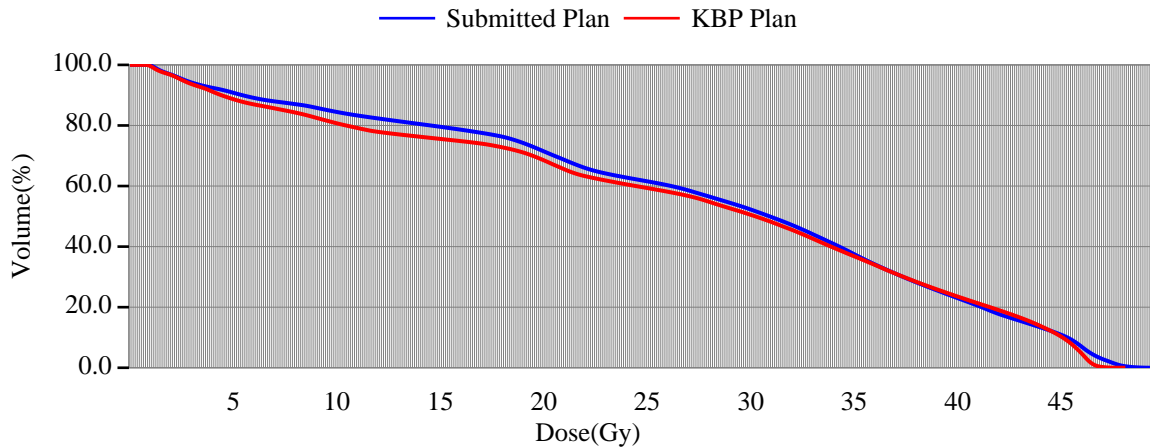

#### Submitted Plan from Institution XXXX for Patient 0000

| Structure: PBM       |                |                              |                      |                          |                                    |                                                                                               |
|----------------------|----------------|------------------------------|----------------------|--------------------------|------------------------------------|-----------------------------------------------------------------------------------------------|
| Dosimetric Parameter | Submitted Plan | protocol compliance criteria |                      |                          | Knowledge based plan quality check |                                                                                               |
|                      |                | Per Protocol                 | Variation Acceptable | Deviation Unacceptable   | KBP Plan                           | KBP Feedback                                                                                  |
| DMeanGy)             | 27.98          | <=27                         | <=29                 | >29 (or KBP prediction)  | 27.11                              | Plan exhibits acceptable variation but this dose metric could likely be improved              |
| V10(%)               | 84.45          | <=85.5%                      | <=90%                | >90% (or KBP prediction) | 80.70                              | Plan meets per protocol specifications, but this dose metric could likely be improved further |
| V20(%)               | 71.44          | <=66%                        | <=75%                | >75% (or KBP prediction) | 68.50                              | Plan exhibits acceptable variation but this dose metric could likely be improved              |

# Knowledge-based Plan Quality Feedback Report

Submitting Institution: XXXX

Patient Identifier: 0000

Report prepared on: 6/13/2016 12:00:00 AM

## Bowel Report

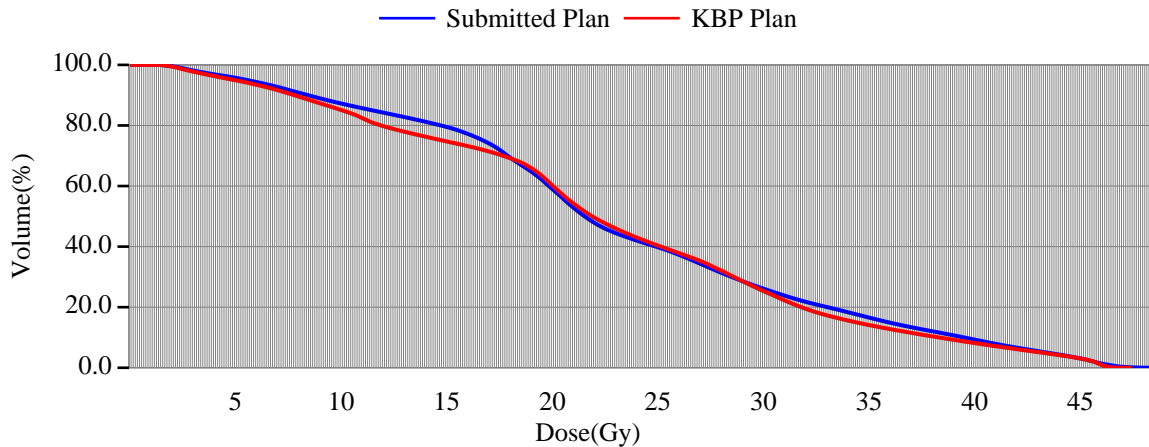

### Submitted Plan from Institution XXXX for Patient 0000

| Structure: Bowel     |                |                              |                      |                           |                                    |                                                                                               |
|----------------------|----------------|------------------------------|----------------------|---------------------------|------------------------------------|-----------------------------------------------------------------------------------------------|
| Dosimetric Parameter | Submitted Plan | protocol compliance criteria |                      |                           | Knowledge based plan quality check |                                                                                               |
|                      |                | Per Protocol                 | Variation Acceptable | Deviation Unacceptable    | KBP Plan                           | KBP Feedback                                                                                  |
| D30%(Gy)             | 28.48          | <=40                         | <=50                 | >50                       | 28.59                              | Plan meets per protocol specifications and is unlikely to be improved further                 |
| DMax(Gy)             | 48.49          | <=59.4                       | <=62.1               | >62.1                     | 47.36                              | Plan meets per protocol specifications, but this dose metric could likely be improved further |
| V45(cc)              | 48.52          | <=200cc                      | <=250cc              | >250cc(or KBP prediction) | 47.90                              | Plan meets per protocol specifications, but this dose metric could likely be improved further |

# Knowledge-based Plan Quality Feedback Report

Submitting Institution: XXXX

Patient Identifier: 0000

Report prepared on: 6/13/2016 12:00:00 AM

## Rectum Report

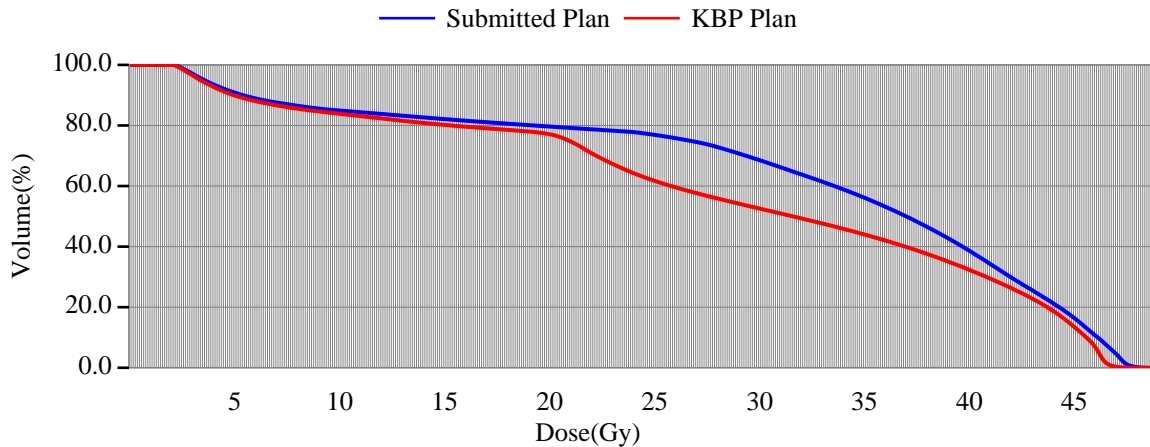

### Submitted Plan from Institution XXXX for Patient 0000

| Structure: rectum    |                |                              |                      |                        |                                    |                                                                                                                      |
|----------------------|----------------|------------------------------|----------------------|------------------------|------------------------------------|----------------------------------------------------------------------------------------------------------------------|
| Dosimetric Parameter | Submitted Plan | protocol compliance criteria |                      |                        | Knowledge based plan quality check |                                                                                                                      |
|                      |                | Per Protocol                 | Variation Acceptable | Deviation Unacceptable | KBP Plan                           | KBP Feedback                                                                                                         |
| D50%(Gy)             | 36.97          | ≤45                          | ≤54                  | >54                    | 31.57                              | Plan meets per protocol specifications, but this dose metric could likely be improved further                        |
| D60%(Gy)             | 33.56          | ≤30                          | ≤47.6                | >47.6                  | 25.78                              | Plan exhibits acceptable variation but this dose metric could likely be improved to meet per protocol specifications |
| DMax(Gy)             | 48.43          | ≤50                          | ≤55                  | >55                    | 48.79                              | Plan meets per protocol specifications and is unlikely to be improved further                                        |

# Knowledge-based Plan Quality Feedback Report

Submitting Institution: XXXX

Patient Identifier: 0000

Report prepared on: 6/13/2016 12:00:00 AM

## Bladder Report

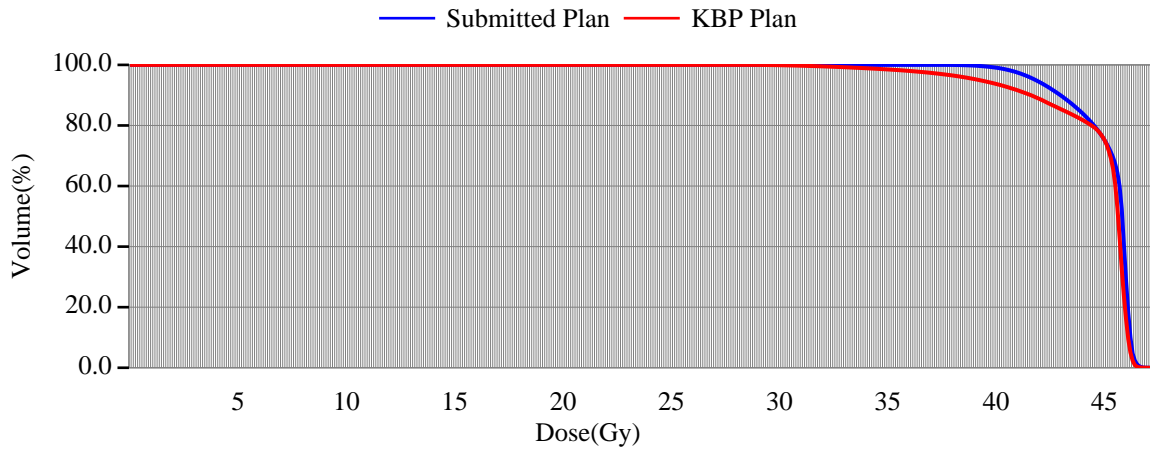

### Submitted Plan from Institution XXXX for Patient 0000

| Structure: bladder   |                |                              |                      |                        |                                    |                                                                                  |
|----------------------|----------------|------------------------------|----------------------|------------------------|------------------------------------|----------------------------------------------------------------------------------|
| Dosimetric Parameter | Submitted Plan | protocol compliance criteria |                      |                        | Knowledge based plan quality check |                                                                                  |
|                      |                | Per Protocol                 | Variation Acceptable | Deviation Unacceptable | KBP Plan                           | KBP Feedback                                                                     |
| D50%(Gy)             | 45.82          | <=45                         | <=55                 | >55                    | 45.63                              | Plan exhibits acceptable variation but this dose metric could likely be improved |
| DMax(Gy)             | 47.07          | <=50                         | <=57.5               | >57.5                  | 47.21                              | Plan meets per protocol specifications and is unlikely to be improved further    |
